# Supplementary material
Source: Springer Nature journal article supplement (https://www.springermedizin.de/resource/supplementary/12950_2011_233_MOESM5_ESM.pdf/9558262)

## Deposition of complement component C3b/c

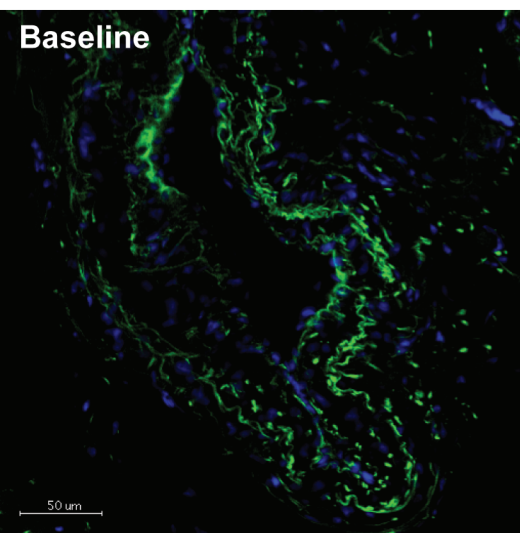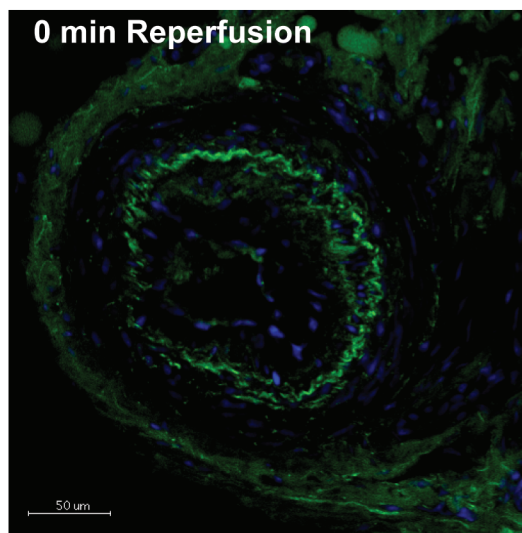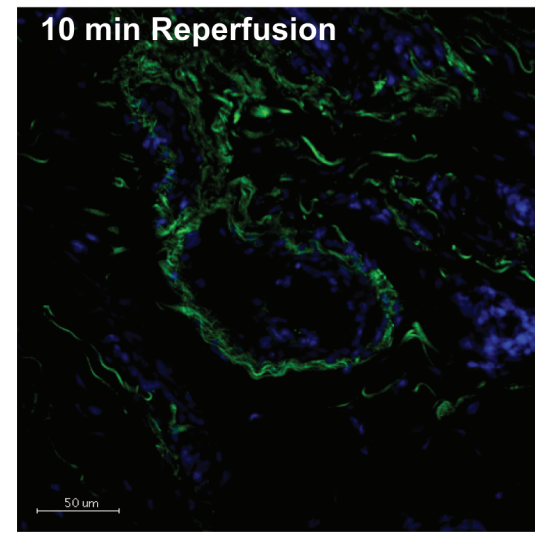

## Deposition of complement component C4b/c

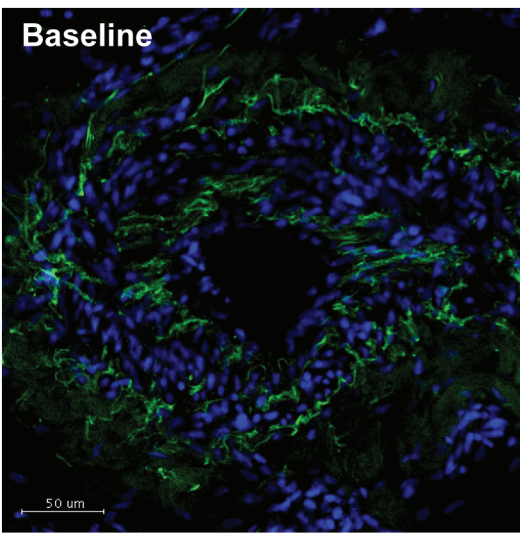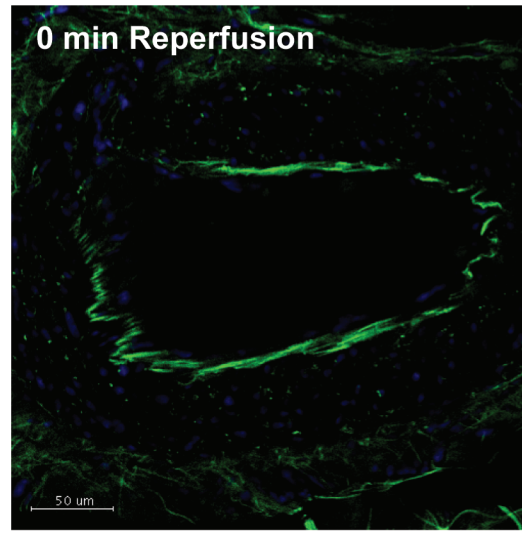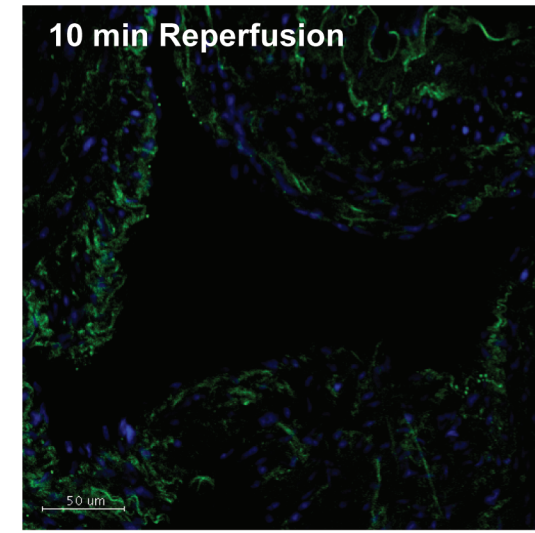

Supplement: MOESM5 [file 9558262]
